# Supplementary material for: Evaluation of Methods for De Novo Genome Assembly from High-Throughput Sequencing Reads Reveals Dependencies That Affect the Quality of the Results
Source: PLoS One. 2011 Sep 7;6(9):e24182. doi: 10.1371/journal.pone.0024182 (PMC3168497; doi:10.1371/journal.pone.0024182)
Supplement: Table S4 — O. sativa assembly details. (XLS) [file pone.0024182.s005.xls]

## Sheet: Table  4
O. Sativa 50x coverage
	Contigs	Max	Mean	N50	Contig sum	Span	Coverage	Match	Insertion	Redundant	Inversion	Relocation	Reorder
Abyss 0%	846	30556	3769.65	4026	3189124	3185365	0.796341	0.500782	1	0.998821	1	0.999735	1
Error 0.5%	847	30556	3770.58	4057	3193684	3189908	0.797477	0.500788	1	0.998818	1	0.999735	1
error 1%	846	30556	3766.89	4026	3186785	3183053	0.795763	0.50078	1	0.998829	1	0.999735	1
Error 1.5%	840	30556	3743.34	3882	3144409	3140709	0.785177	0.500748	1	0.998823	1	0.999733	1
Error 2%	813	30556	3640.12	3306	2959419	2955836	0.738959	0.50059	0.999987	0.998802	1	0.999726	1
Error 2.5%	729	30556	3294.54	1943	2401721	2398649	0.599662	0.500046	0.999983	0.998738	1	0.998974	0.99976
error 5%	7	4381	1767	0	12369	12346	0.0030865	0.398312	1	0.998141	1	0.999434	1
Edena 0%	843	30557	3842.71	4171	3239408	3233249	0.808312	0.500871	1	0.998099	1	0.99974	1
Error 0.5%	841	30557	3838.96	4146	3228568	3222662	0.805666	0.500838	1	0.998171	1	0.99974	1
error 1%	875	30529	3695.54	4068	3233598	3227325	0.806831	0.500784	1	0.99806	1	0.999729	1
Error 1.5%	907	22803	3533.27	3668	3204680	3198486	0.799621	0.500667	1	0.998067	1	0.999717	1
Error 2%	1100	25741	2758.49	2462	3034340	3030127	0.757532	0.500318	0.999997	0.998615	1	0.999638	1
Error 2.5%	1176	7231	1815.83	1097	2135421	2134335	0.533584	0.499858	0.999969	0.999522	1	0.999425	1
error 5%	-	-	-	-	-	-	-	-	-	-
Velvet 0%	829	30556	3917.39	4210	3247518	3243977	0.810994	0.500842	1	0.99891	1	0.999745	1
Error 0.5%	855	30556	3760.95	4029	3215611	3211995	0.802999	0.500758	1	0.998875	1	0.999734	1
error 1%	890	30556	3567.76	3681	3175307	3171850	0.792963	0.500667	1	0.998911	1	0.99972	1
Error 1.5%	944	23776	3335.6	3280	3148803	3144956	0.786239	0.500589	0.999997	0.998781	1	0.9997	1
Error 2%	949	29676	3280.5	3154	3113196	3108751	0.777188	0.500587	0.999996	0.998576	1	0.999695	1
Error 2.5%	1040	25760	2922.66	2628	3039571	3033105	0.758276	0.500466	0.999973	0.9979	1	0.99966	1
error 5%	18	3100	1259.61	0	22673	22654	0.0056635	0.449676	0.999162	1	1	0.999206	1
Best values		30557	3917.39	4210	3247518	3243977	0.810994	0.500871	1	1	1	0.999745	1
Sequence length						4000000
