# Supplementary material for: Evaluation of Methods for De Novo Genome Assembly from High-Throughput Sequencing Reads Reveals Dependencies That Affect the Quality of the Results
Source: PLoS One. 2011 Sep 7;6(9):e24182. doi: 10.1371/journal.pone.0024182 (PMC3168497; doi:10.1371/journal.pone.0024182)
Supplement: Table S5 — E. coli assembly details. (XLS) [file pone.0024182.s006.xls]

## Sheet: Table 5
E. coli 50x coverage
	Contigs	Max	Mean	N50	Contig sum	Span	Coverage	Match	Insertion	Redundant	Inversion	Relocation	Reorder
Abyss 0%	334	127976	13403.9	21541	4476887	4474374	0.964372	0.504672	1	0.999439	1	0.999925	1
error 1%	334	127976	13403.9	21541	4476887	4474374	0.964372	0.504672	1	0.999439	1	0.999925	1
error 5%	4	1331	1181.25	0	4725	4725	0.00101839	0.307239	1	1	1	0.999153	1
Edena 0%	323	127979	13907.8	22595	4492231	4488588	0.967436	0.504718	1	0.999189	1	0.999928	1
error 1%	381	120935	11763.7	16778	4481956	4478706	0.965306	0.503573	1	0.999275	1	0.999915	1
error 5%	-	-	-	-	-	-	-	-	-	-	-	-	-
Velvet 0%	330	127976	13627.2	22580	4496964	4494535	0.968718	0.504861	1	0.99946	1	0.999927	1
error 1%	438	61817	10248.9	15574	4489003	4486537	0.966994	0.502671	0.999998	0.999452	1	0.999902	1
error 5%	24	1464	1167.58	0	28022	28002	0.00603534	0.453599	0.999286	1	1	0.999179	1
Best values		127979	13907.8	22595	4496964	4494535	0.968718	0.504861	1	1	1	0.999928	1
Sequence length					4639675
