# Supplementary material for: Evaluation of Methods for De Novo Genome Assembly from High-Throughput Sequencing Reads Reveals Dependencies That Affect the Quality of the Results
Source: PLoS One. 2011 Sep 7;6(9):e24182. doi: 10.1371/journal.pone.0024182 (PMC3168497; doi:10.1371/journal.pone.0024182)
Supplement: Table S9 — O. sativa assembly details with varying pair distances. (XLS) [file pone.0024182.s010.xls]

## Sheet: Table 9
O. Sativa 50x coverage, varying pair distances
	Contigs	Max	Mean	N50	Contig sum	Span	Coverage	Match	Insertion	Redundant	Inversion	Relocation	Reorder
Abyss Unpaired 0%	846	30556	3769.65	4026	3189124	3185365	0.796341	0.500782	1	0.998821	1	0.999735	1
400 nt 0%	333	87007	12414.5	25197	4134015	3790095	0.947524	0.504807	0.999537	0.91727	1	0.999846	1
1000 nt 0%	253	99836	16335.8	28777	4132964	3739239	0.93481	0.505651	0.984438	0.920298	0.999916	0.999695	0.999968
3000 nt 0%	251	158789	15536.4	28777	3899625	3665213	0.916303	0.505598	1	0.939889	1	0.999717	0.99962
Unpaired 1%	846	30556	3766.89	4026	3186785	3183053	0.795763	0.50078	1	0.998829	1	0.999735	1
400 nt 1%	327	99479	12471.9	24120	4078296	3782054	0.945514	0.504669	1	0.927361	1	0.999851	1
1000 nt 1%	272	99836	15100	24903	4107192	3738255	0.934564	0.505182	0.99809	0.912083	1	0.999887	1
3000 nt 1%	291	99988	13270.7	23125	3861771	3643563	0.910891	0.504393	1	0.943495	1	0.999925	1
Unpaired 5%	7	4381	1767	0	12369	12346	0.0030865	0.398312	1	0.998141	1	0.999434	1
400 nt 5%	454	3168	1359.03	0	617000	590885	0.147721	0.498063	0.987426	0.970248	0.998405	0.997224	0.999388
1000 nt 5%	146	3641	1411.67	0	206104	184054	0.0460135	0.493002	0.993809	0.899206	1	0.999039	1
3000 nt 5%	101	2487	1231.11	0	124342	124312	0.031078	0.490402	1	0.999759	1	0.999107	1
Velvet Unpaired 0%	829	30556	3917.39	4210	3247518	3243977	0.810994	0.500842	1	0.99891	1	0.999745	1
400 nt 0%	104	180857	37223.5	76347	3871244	3870831	0.967708	0.508089	0.999923	0.999971	1	0.999377	1
1000 nt 0%	64	209422	60748.4	127984	3887896	3887529	0.971882	0.510638	0.999971	0.999935	0.999966	0.99916	0.999908
3000 nt 0%	62	392753	63178.5	146760	3917070	3912082	0.97802	0.511506	0.999971	0.998755	1	0.99925	1
Unpaired 1%	890	30556	3567.76	3681	3175307	3171850	0.792963	0.500667	1	0.998911	1	0.99972	1
400 nt 1%	167	145444	22980.1	42952	3837679	3835201	0.9588	0.506048	0.999965	0.999389	0.990315	0.98229	0.987966
1000 nt 1%	127	162460	30238.6	56753	3840308	3836202	0.959051	0.506725	0.999947	0.998984	0.98652	0.970297	0.983545
3000 nt 1%	149	161136	25763.8	57810	3838806	3834718	0.95868	0.50674	0.999978	0.998957	0.99086	0.971481	0.998463
Unpaired 5%	18	3100	1259.61	0	22673	22654	0.0056635	0.449676	0.999162	1	1	0.999206	1
400 nt 5%	25	4257	1514.8	0	37870	37839	0.00945975	0.461942	0.999181	1	0.992976	0.987272	1
1000 nt 5%	18	3985	1558	0	28044	28042	0.0070105	0.463493	0.999929	1	0.960455	0.947689	0.952492
3000 nt 5%	19	5055	1545.37	0	29362	29203	0.00730075	0.460746	0.994687	0.999898	0.981677	0.981098	0.96346
Best values		392753	63178.5	146760	4134015	3912082	0.97802	0.511506	1	1	1	0.999925	1
Sequence length						4000000
